# Supplementary material
Source: publisher figshare collection journal article supplement (https://frontiersin.figshare.com/ndownloader/files/24141956)
Supplement: Supplementary file [file 24141956]

**Supplemental Figure 1: The stage and grade of HCA (Redline et al., 2003)**

| <b>Sample number</b> | <b>Stage</b> | <b>Grade</b> |
|----------------------|--------------|--------------|
| #1                   | 1            | 1            |
| #2                   | 1            | 1            |
| #3                   | 2            | 2            |
| #4                   | 2            | 1            |
| #5                   | 2            | 1            |

Stage: 1 = acute subchorionitis or chorionitis, 2 = acute chorioamnionitis, 3 = necrotising chorioamnionitis

Grade = 1: not severe as defined by Grade 2; 2: confluent PMN between chorion and decidua; 3: isolated foci or continuous band
